1 **Combining auxin-induced degradation and RNAi screening identifies**  
2 **novel genes involved in lipid bilayer stress sensing in**  
3 ***Caenorhabditis elegans***

4 Richard Venz<sup>1§</sup>, Anastasiia Korosteleva<sup>1</sup> and Collin Y. Ewald<sup>1\*</sup>

5

6 **1** Eidgenössische Technische Hochschule Zürich, Department of Health Sciences and  
7 Technology, Institute of Translational Medicine, Schwerzenbach-Zürich CH-8603, Switzerland

8 \*Corresponding author: [collin-ewald@ethz.ch](mailto:collin-ewald@ethz.ch) (CYE)

9

10 **Keywords:**

11 Lipid bilayer stress, Lipotoxicity, Unfolded Protein Stress, Auxin-induced degradation,  
12 CREB3, NRF2, MDT-15

13

14 **Abstract**

15 Alteration of the lipid composition of biological membranes interferes with their function  
16 and can cause tissue damage by triggering apoptosis. Upon lipid bilayer stress, the  
17 endoplasmic reticulum mounts a stress response that is similar to the unfolded protein  
18 response. However, only a few genes are known to regulate lipid bilayer stress. Here,  
19 we performed a suppressor screen that combined the auxin-inducible degradation  
20 (AID) system with conventional RNAi in *C. elegans* to identify members of the lipid  
21 bilayer stress response. AID-mediated knockdown of the mediator MDT-15, a protein  
22 required for the upregulation of fatty acid desaturases, caused activation of a lipid  
23 bilayer stress sensitive reporters. We screened through almost all *C. elegans* kinases  
24 and transcription factors using RNAi by feeding. We report the identification of 8 genes  
25 that have not been implicated previously with lipid bilayer stress before in *C. elegans*.  
26 These suppressor genes include *skn-1/NRF1,2,3* and *let-607/CREB3*. Our candidate  
27 suppressor genes suggest a network of transcription factors and the integration of  
28 multiple tissues for a centralized lipotoxicity response in the intestine. Additionally, we  
29 propose and demonstrate the proof-of-concept for combining AID and RNAi as a new  
30 screening strategy.

31

## 32 **Introduction**

33 Biological membranes play an important role in protein folding, signaling, secretion,  
34 and turnover of proteins. Changes in the lipid composition of a membrane alters its  
35 properties, thus, interferes with its function and leads to lipid bilayer stress (LBS)  
36 (Covino et al., 2018). Maintaining the membranes' composition is therefore crucial for  
37 a cell. High dietary intake of saturated fatty acids leads to a metabolic syndrome  
38 referred to as lipotoxicity (Ertunc and Hotamisligil, 2016). On a cellular level, elevated  
39 levels of saturated fatty acids alter membrane composition. Sensitive for these  
40 changes is the endoplasmic reticulum, which is a major site for protein and lipid  
41 synthesis, and the main intracellular calcium storage (Schwarz and Blower, 2016).  
42 Lipid disequilibrium interferes with secretory capacity, and renders cells specialized in  
43 secretion, such as insulin-producing beta cells, susceptible to cell death (Preston et  
44 al., 2009, Acosta-Montaño and García-González 2018). Although LBS has been  
45 suggested to play a major part in disease progression, the spectrum of the underlying  
46 molecular players sensing LBS remains to be identified.

47 The unfolded protein (UPR) sensors IRE1, PERK1, and ATF6 have been found  
48 to be sensitive for changes in membrane fluidity (Volmer et al., 2013; Koh et al., 2018).  
49 On the molecular level, IRE1, PERK1, and ATF6 act in parallel in response to unfolded  
50 proteins (Fig. 1a). Activated IRE1 splices *XBP1* mRNA to stabilize the transcript and  
51 to allow translation of the spliced XBP1 transcription factor (Fig. 1a). PERK1  
52 phosphorylates the initiation factor eIF2alpha, which reduces translation rate and  
53 allows preferential translation of genes containing upstream open reading frames  
54 (uORFs), such as the transcription factor ATF4 (Harding et al., 2000; Fig. 1a). During  
55 ER stress, ATF6 translocates from the ER to the Golgi, where it is cleaved by proteases

56 called S1P and S2P. Cleaved ATF6 migrates to the nucleus and acts as a transcription  
57 factor (Fig. 1a). The transcription factors co-regulate many targets, but how the  
58 downstream targets of the three arms of the UPR restore membrane homeostasis in  
59 detail remains unknown.

60 In *C. elegans*, loss of fatty acid desaturases *fat-6* and *fat-7* or the mediator *mdt-*  
61 *15*, which regulates *fat-6/7* expression, leads to higher ratio of saturated fatty acids in  
62 the membranes. This activates the ER stress reporter *hsp-4::gfp* via the IRE-1/XBP-1  
63 axis (Hou et al., 2014). Activation of the ER stress sensor can also be achieved by  
64 depleting the cell's phosphatidylcholine levels. Curiously, the signature of lipid bilayer  
65 stress response is different from the canonical UPR in *C. elegans* (Hou et al., 2014;  
66 Koh et al., 2018). This argues for an additional layer of regulation that fine-tunes the  
67 output during activation of the three UPR arms (Fig. 1a).

68 Genetic mutant screening for members of the UPR have been successful  
69 (Calfon et al., 2002; Singh and Aballay, 2017), but might have missed lethal genes.  
70 RNAi-based forward screens can bypass genes that cause embryonal lethality or  
71 developmental defects. However, feeding more than one RNAi simultaneously was  
72 previously reported to produce poor results (Min et al., 2010). This suggests a  
73 bottleneck for screening strategies where one would like to screen for suppressors of  
74 a phenotype caused by a knock down using an RNAi-mediated screen.

75 The auxin inducible degradation (AID) has been introduced into *C. elegans*  
76 recently (Zhang et al., 2015). A protein of interest can be tagged with a short 68 amino  
77 acid sequence, which is recognized by the E3 ubiquitin ligase TIR1 derived from  
78 *Arabidopsis thaliana* in the presence of a small molecule called auxin. Ubiquitination  
79 targets the degron-tagged protein for fast degradation by the proteasome. Half times

80 less than 30 minutes have been reported for cytosolic proteins after transferring  
81 animals co-expressing a degron-tagged protein and TIR1 on plates containing auxin  
82 (Zhang et al., 2015). The AID is therefore faster and more efficient than RNAi. Since  
83 AID initiates protein degradation and RNAi initiates mRNA degradation, these two  
84 systems do not compete with each other and can be used in parallel.

85 Here, we identify suppressors of lipid bilayer stress using a novel approach by  
86 combining AID and RNAi-based forward genetic screening. Knockdown of MDT-15 by  
87 AID was used to induce LBS, which was visualized using the endoplasmic reticulum  
88 stress sensors *Patf-4::gfp* and *Phsp-4::gfp*. We screened the RNAi libraries targeting  
89 kinases and transcription factors for suppressors. Out of 868 genes, we identified 8  
90 novel hits that robustly blocked LBS caused by MDT-15 knockdown.

91

## 92 **Material and Methods**

### 93 **Strains**

94 All strains were maintained at 20°C on OP50 *Escherichia coli* as described.

95 Strains used in this study are either available from CGC or upon request:

96 **IJ1729**: *ieSi57* [*Peft-3::TIR1::mRuby::unc-54* 3'UTR; *cb-unc-119*] II; *yh44* [*mdt-*  
97 *15::degron::EmGFP*] III. (Lee et al., 2019)

98 **SJ4005**: *zcls4* [*Phsp-4::GFP*] V. (Harding et al., 2000)

99 **LD1499**: [*Patf-4(uORF)::GFP::unc-54(3'UTR)*]

100 **LSD2096**: *ieSi57* [*Peft-3::TIR1::mRuby::unc-54(3'UTR)*; *cb-unc-119*] II; *yh44* [*mdt-*  
101 *15::degron::EmGFP*] III; [*Patf-4(uORF)::GFP::unc-54(3'UTR)*].

102 **LSD2102**: *ieSi57* [*Peft-3::TIR1::mRuby::unc-54* 3'UTR; *cb-unc-119*] II; *yh44* [*mdt-*  
103 *15::degron::EmGFP*] III; *zcls4* [*Phsp-4::GFP*] V.

104 For generation of the screening strain, IJ1729 males was crossed with LD1499. 48 F2  
105 were singled and their offspring were put on plates containing 100 µM Auxin and  
106 checked for upregulation of the reporter (Fig. 2a). In parallel, IJ1729 was crossed to  
107 SJ4005.

108

### 109 **Microscopy**

110 For image acquisition, the animals were put on freshly made 2% agar pads and  
111 anesthetized with 1 mM tetramisole. Images were taken with an upright bright field  
112 fluorescence microscope (Tritech Research, model: BX-51-F) and a camera of the  
113 model DFK 23UX236 (Teuscher and Ewald, 2018).

114

## 115 **Preparation of Auxin**

116 70 mg of Auxin (3-Indoleacetic acid, Sigma #I3750) were dissolved in 10 ml DMSO to  
117 yield a 40 mM stock solution and stored at 4°C. The stock was further diluted in M9  
118 to 100 µM before use.

119

## 120 **Suppressor screen design**

121 A detailed step-by-step protocol can be found in the supplement and a schematic  
122 outline is shown in Fig. 2b.

123 Briefly, 24-well plates were filled with NGM containing Ampicillin (100 µg/ml),  
124 Tetracyclin (12.5 µg/ml) and 1mM IPTG, seeded with 50 µl of freshly grown RNAi  
125 bacteria and dried in a sterile hood. On the next day, plates containing gravid LSD2096  
126 adults were washed off and discarded and the laid eggs were scratched off and  
127 collected. Approximately 30-40 eggs were pipetted into a well and incubated at 20°C.  
128 After 48 hours, the wells were top coated with 50 µl of 100 µM Auxin, dried in a sterile  
129 hood and put at 20°C overnight. The following day, the wells were screened for  
130 suppression of the GFP signal. The kinase and transcription factor libraries were  
131 screened twice. The preliminary hits had to successfully pass three additional runs on  
132 6 cm plates.

133

## 134 **Heat-shock and tunicamycin treatment**

135 Animals, RNAi bacteria, and plates were prepared as above, without the addition of  
136 auxin. Heat-shock was carried out for 1 hour at 37°C, incubated for 5 hours at 25°C,  
137 and the animals were checked for GFP expression. Plates were top coated with 0.5 ml  
138 of 35 µg/ml tunicamycin (Sigma, T7765), incubated for 6 hours at 25°C, and the  
139 animals were checked for GFP expression.

140



## 141 Results and Discussion

142 To find a suitable reporter for screening, we used RNAi against *mdt-15* and *fat-6/7* and  
143 found two reporters *Patf-4::gfp* and *Phsp-4::gfp* that are activated by LBS (Fig. 1b). For  
144 screening, we preferred *Patf-4::gfp* over *Phsp-4::gfp* for its stronger induction of GFP.  
145 Crossing *mdt-15(tm2182)* mutant with *Patf-4::gfp* led to a heterogeneous GFP  
146 expression, making it impossible to use this strain for screening. We therefore switched  
147 to an endogenously degron-tagged *mdt-15* strain (Lee et al., 2019). Unstressed MDT-  
148 15::degron *C. elegans* expressed *Patf-4::gfp* only at basal levels at 20°C. Incubation  
149 with 100 µM Auxin for 24 hours increased GFP levels drastically and homogenously  
150 (Fig. 2a). We additionally observed typical *mdt-15* phenotypes such as small body size,  
151 reduced brood size, and a pale appearance (Taubert et al., 2008; Lee et al., 2019).  
152 Surprisingly, the eggs of untreated animals were sensitive to bleaching. Either, the  
153 screening strain carries a background mutation or degron-tagged *mdt-15* is slightly  
154 hypomorph. We continued with our screen by collecting laid eggs off the bacterial lawn.

155 To gain insights into LBS, we took a targeted RNAi approach. We decided to  
156 screen through almost all *C. elegans* kinases (441 genes) and transcription factors  
157 (427 genes; Fig. 2b). Our first-pass screening round resulted in 6 kinases and 31  
158 transcription factors (Fig. 2b). To sort out false positives, we tested the preliminary hits  
159 on 6 cm plates and ended up with 23 verified hits that block *Patf-4::gfp* induction (Fig.  
160 2b, 2c; Supplementary Table 1). To test whether the hits are specific for lipid bilayer  
161 stress, and not general inhibitors of the unfolded protein response, we heat-shocked  
162 the animals and treated them with the N-glycosylation-inhibitor tunicamycin (Fig. 2b).  
163 Most of the clones not passing this step were wrongly annotated GFP clones  
164 (Supplementary Table 1). Reassuringly, we detected *xbp-1*, a transcription factor

165 spliced by IRE-1 (Supplementary Table 1). XPB-1 is known to upregulate *hsp-4* mRNA  
166 during UPR (Calton et al., 2002). To rule out transgene-specific effects, we crossed  
167 *Phsp-4::gfp* into *mdt-15::degron*;TIR1 and tested the hits that have passed the  
168 previous steps (Fig. 2b). Only the weakest hit, *ztf-1*, did not pass this step  
169 (Supplementary Table 1). We ended up with 9 high confidence hits, 8 of them not  
170 previously described in *C. elegans* (Table 1). Taken together, with our novel approach  
171 of combining AID and RNAi screening, we bypassed developmental and lethal  
172 obstacles caused by depletion of *mdt-15*. Our screen revealed a known molecular  
173 player (IRE-1), but also identified several new genes important to mount a proper LBS  
174 response. Thus, our results provide a proof-of-concept and support the feasibility of  
175 combined AID-RNAi screening approaches.

176

### 177 **Regulation of LBS by IRE-1 and XBP-1**

178 We unbiasedly detected IRE-1, which has previously been proposed as a sensor for  
179 LBS in yeast and in *C. elegans*, and its target *xbp-1* (Thibault et al., 2012). This  
180 confirms the selectivity of our screen. Unfolded proteins in the ER lead to IRE1  
181 oligomerization and the subsequent stimulation of its endoribonuclease activity and  
182 splicing of the transcription factor *xbp-1*. However, monomeric IRE1 still displays  
183 RNase activity and splices XBP1 mRNA in HeLa cells during LBS (Kitai et al., 2013;  
184 Ho et al., 2020). Spliced mRNA of *xbp-1* is much more stable than the unspliced  
185 variant. IRE-1 is not needed for heat-shock or tunicamycin-induced UPR, but its target  
186 *xbp-1* (Supplemental Table 1). We did not detect *pek-1* and *atf-6*, the other members  
187 of the canonical UPR. Thus, we confirmed that IRE-1 branch acts as a major sensor  
188 of LBS.

189

190 ***Immunity response network regulates lipid bilayer stress***

191 Knocking down phosphatidylcholine synthesis leads to activation of genes involved in  
192 the immune response (Koh et al., 2018). Many of these transcripts are upregulated in  
193 an IRE-1-dependent manner. In addition to *ire-1*, we detected the NRF1,2,3  
194 homologue *skn-1* and the GATA transcription factor *elt-2*. Both are involved in p38-  
195 mediated innate immunity (Block et al., 2015; Blackwell et al., 2015). RNAi of *skn-1*  
196 was one of our strongest suppressors (Fig. 1c). SKN-1 is a major transcription factor  
197 for promoting oxidative stress resistance (Blackwell et al., 2015). There are four  
198 isoforms of SKN-1: *skn-1a*, *b*, *c*, *d* (Blackwell et al., 2015). A previous study  
199 demonstrated that IRE-1 has an additional mode of action in its monomeric state:  
200 elevated levels of reactive oxygen species leads to sulfenylation of cysteine residues  
201 in IRE-1 and activates SKN-1a via the p38 MAPK (Glover-Cutter et al., 2013; Hourihan  
202 et al., 2016). Isoform *skn-1a* is similar to mammalian NRF1, which regulates  
203 proteostasis and is a transmembrane protein located in the ER (Lehrbach and Ruvkun,  
204 2016; Wang and Chan, 2006). Curiously, *mdt-15* and *skn-1c*, but not *skn-1a*, co-  
205 regulate targets involved in detoxification such as *gst-4* (Goh et al., 2014). This  
206 suggests that SKN-1a is not only activated by loss of *mdt-15*, but also works  
207 independently of MDT-15. *skn-1* knockdown does not only block LBS response, but  
208 also reverses the small body size and the small amount of eggs laid (although these  
209 eggs do not hatch because *skn-1* knockdown is embryonic lethal). This suggests that  
210 some of the observed phenotypes in *mdt-15* mutants or knockdowns are *skn-1*-  
211 dependent. The mammalian SKN-1c orthologue NRF2 has been shown to have  
212 protective functions during palmitate-induced lipotoxicity in mammalian cells (Cunha et

213 al., 2016; Park et al., 2015). Taken together, this suggests a potential isoform-specific  
214 role for SKN-1a during LBS.

215 *elt-2* is a GATA transcription factor that is essential for the mesodermal cell fate  
216 and development of the intestine. While null mutants of *elt-2* are embryonic lethal, post-  
217 developmental knockdown shortens lifespan and overexpression extends lifespan  
218 (Mann et al., 2016). We observed developmental arrest after *elt-2* knockdown. These  
219 arrested larvae were still susceptible to heat and tunicamycin treatments, indicating  
220 that the UPR was still intact. Similar to *skn-1*, *elt-2* is recruited to promoters during  
221 *Pseudomonas aeruginosa* infection and co-regulates targets in a p38-mediated  
222 fashion (Block et al., 2015). Furthermore, *elt-2* and *mdt-15* cooperate during heavy  
223 metal intoxication (Shomer et al., 2019), strengthening the existence of a transcription  
224 factor network that cooperatively regulates different stress responses.

225

### 226 ***Modulators and activators of the LBS response (let-607, gsk-3 and drl-1)***

227 We found three genes, *let-607*, *gsk-3*, and *drl-1*, implicated in modulating the ER stress  
228 responses. RNAi of *let-607* suppressed the activation of the *atf-4* reporter completely  
229 (Fig. 2c). *let-607* is, together with *crh-1* and *crh-2*, one of the CREB3 orthologues in *C.*  
230 *elegans*. The mammalian Creb3 family consists of five members (CREB3/Luman,  
231 CREB3L1/OASIS, CREB3L2/BBF2H7, CREB3L3/CREBH, and CREB3L4) and is  
232 related to ATF6 and SREBP (Sampieri et al., 2019). All of them are localized in the ER  
233 and are similar to ATF6 activated by anterograde transport to the Golgi and subsequent  
234 cleavage by S1P or S2P. In humans and mice, CREB3L2 upregulates SEC23 and  
235 controls secretory load, especially during bone formation (Saito et al., 2009; Tomoishi  
236 et al., 2017; Al-Maskari et al., 2018; Khetchoumian et al., 2019). CREB3 and CREB3L3

237 are induced after palmitate-induced ER stress and knock down of CREB3 by siRNA  
238 sensitizes human islet cells to palmitate-induced ER stress (Cnop et al., 2014). CREB3  
239 has been identified in regulating Golgi-stress and activates ARF4 (Reiling et al., 2013).  
240 A previous study in *C. elegans* links *let-607* with the upregulation of *sec-23* and other  
241 proteins involved in secretion (Weicksel et al., 2016). *let-607* has also been identified  
242 in a screen for suppressors of PolyQ aggregation and suppresses motility defects  
243 caused by mutations in the paramyosin ortholog UNC-15, the basement-membrane  
244 protein perlecan UNC-52, the myosin-assembly protein UNC-45, and the myosin  
245 heavy chain UNC-54 (Silva et al., 2011). In addition, knock down of *let-607* increased  
246 expression of cytosolic heat-shock proteins. Based on these previous observations  
247 and our results, we propose that *let-607*/CREB3 family is sensing LBS and acts  
248 together with the other identified transcription factor encoding genes *xbp-1*, *skn-1*, and  
249 *elt-2* to mount a unique stress response that is different from the canonical UPR.

250 *drl-1*, also known as *mekk-3*, has been found in a screen looking for enhancers  
251 of dauer formation and extends lifespan by simulating dietary restricted-like conditions  
252 (Chamoli et al., 2014). Curiously, loss of *drl-1* causes a pale appearance of the animals  
253 resembling *fat-6/7* and *mdt-15* mutants, but the mode-of-action seems to be different.  
254 The *drl-1* promoter is expressed in vulval muscles, body wall muscles, hypodermis,  
255 seam cells, some neurons, and tissues lining the pharynx and anus, but not the  
256 intestine. Additionally, knockdown in the intestine using tissue-specific RNAi did not  
257 extend lifespan (Chamoli et al., 2014). Knockdown of MDT-15 activates *Patf-4::gfp* and  
258 *Phsp-4::gfp* expression mainly in the intestine (Fig 1b). Therefore, knockdown of *drl-1*  
259 acts in a cell non-autonomous manner. *drl-1* decreases fat storage by upregulating  
260 fatty acid oxidation (Chamoli et al., 2014). The *C. elegans* orthologue of the  
261 ribonuclease Regnase-1, *rege-1*, shares many upregulated genes and causes a pale

262 appearance without activation of LBS (Supplementary Table 1; Habacher et al. 2016).  
263 This suggests a link between *drl-1* and *rege-1*. However, knockdown of *rege-1* does  
264 not phenocopy loss of *drl-1* (Supplementary Table 1). Despite the striking similarities  
265 shared by *rege-1* and *drl-1*, only *drl-1* modulates LBS. Intriguingly, *drl-1* knockdown  
266 itself causes ER stress at the L2 stage and this mounts a protective effect throughout  
267 life (Matai et al., 2019). Since *drl-1* rewires metabolism by mimicking dietary restriction,  
268 we speculate that activation of fatty acid oxidation protects from lipotoxicity. Indeed,  
269 we observed that starved animals in wells with no food did not upregulate the reporter.

270 The glycogen synthase kinase-3 (*gsk-3*) has been described as the busiest of  
271 all kinases with over 100 targets known, and was found to attenuate palmitate-induced  
272 apoptosis (Beurel et al., 2015; Ibrahim et al., 2011). Paradoxically, *gsk-3* inhibits *skn-*  
273 *1* and stabilizes CREB3, both contradicting with the results of our screen (An et al.,  
274 2005; Barbosa et al., 2013). If it does not act on the other hits, what could be its mode  
275 of action? Activation of the lipid bilayer stress activates autophagy via the IRE-1/XBP-  
276 1 axis (Ho et al., 2020). Blocking autophagy in this context causes sickness, sterility  
277 and developmental defects. Intriguingly, GSK3 inhibition activates autophagy (Parr et  
278 al., 2012). We therefore speculate that prior knock down of GSK3 leads to an elevated  
279 rate of autophagy, which protects from LBS and ameliorates the stress response.

280

### 281 **General players in gene expression, but specific for LBS**

282 The last three hits consist of *gtf-2f2*, *ntl-4*, and *rpl-14*, which are involved in  
283 transcription, RNA processing, and translation, respectively. Interestingly, although  
284 with RNAi against *gtf-2f2*, *ntl-4*, and *rpl-14* inactivate general processes, the heat- or

285 tunicamycin induced UPR is still functioning and is not affected. This favors the model  
286 that UPR and LBS are differentially regulated (Fig. 3).

287

## 288 **Summary**

289 We report the identification of 8 novel regulators of the lipid bilayer stress response.

290 We grouped them into three categories (Fig. 3). *skn-1* and *elt-2*, together with the  
291 previously characterized *ire-1*, are transcription factors involved in immune response.

292 *let-607* might be activated in parallel with the canonical UPR arms, and *drl-1* and *gsk-*  
293 *3* modulate the ER stress response in our suggested model upstream or downstream,

294 respectively. The last category consists of genes involved in general processes of gene

295 expression. Furthermore, we highlight the potential of combining AID and RNAi-based  
296 genetic screens.

297

## 298 **Acknowledgement**

299 We thank Chi Yun and David Ron for the *Patf-4::gfp* strain, Seung-Jae V. Lee for the

300 *mdt-15::degron* strain, Gary Ruvkun for kinase and transcription factor RNAi libraries,

301 Keith Blackwell and Ewald Lab members for comments on the manuscript. Some

302 strains were provided by the CGC, which is funded by NIH Office of Research

303 Infrastructure Programs (P40 OD010440). Funding from the Swiss National Science

304 Foundation PP00P3\_163898 to CYE and ETH Research Foundation Grant ETH-30

305 16-2 to RV.

306

307

308 **Figures**

**a**

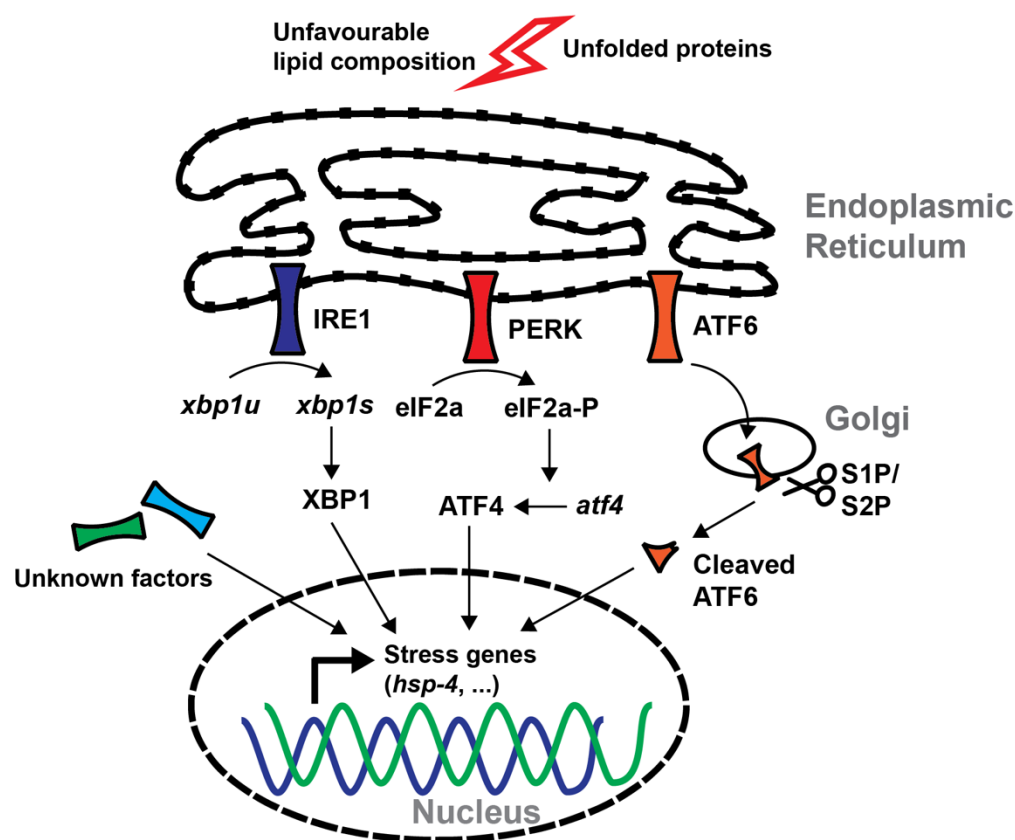

**b**

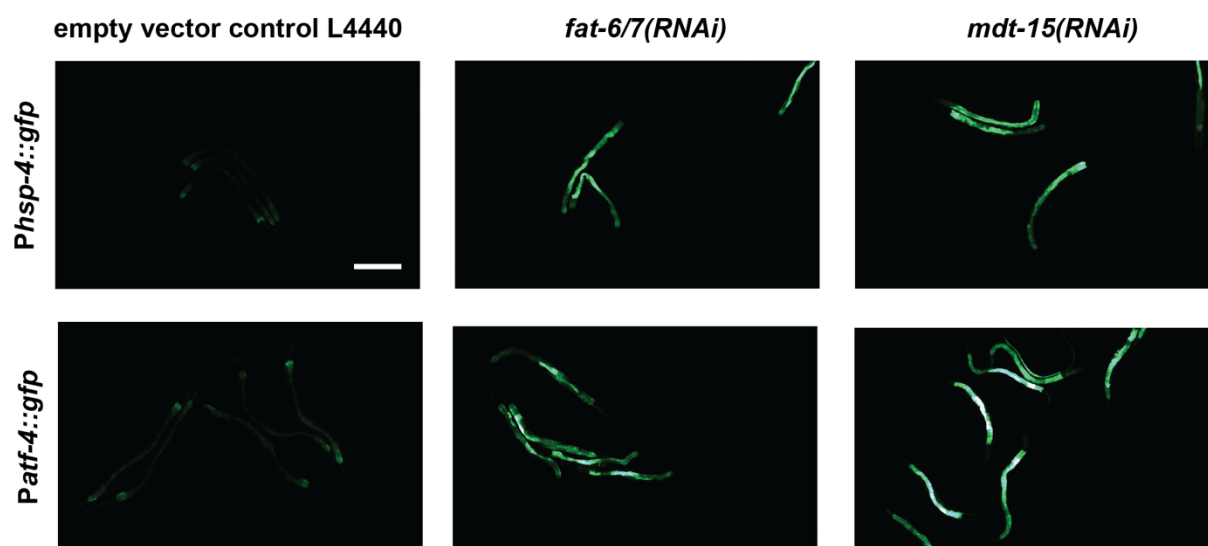

309

310 **Figure 1. Integrated stress response of *C. elegans***

311 a) Model of the unfolded protein and lipid bilayer stress response.

312 b) *Phsp-4::gfp* and *Patf-4::gfp* are activated by *fat-6/7(RNAi)* and *mdt-15(RNAi)*.

313 Bar = 200  $\mu$ m.



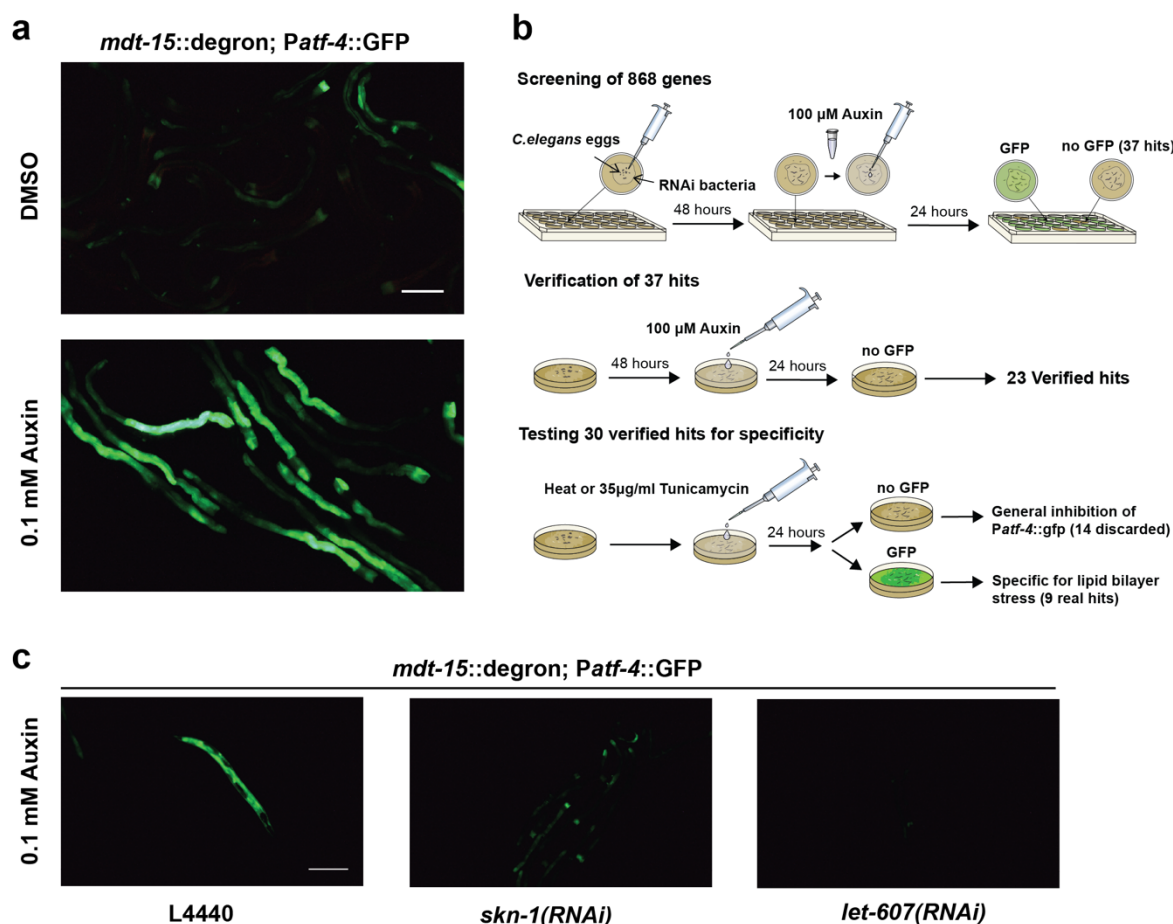

**Table 1**

| Gene name      | Level of repression | Short description                                                                               |
|----------------|---------------------|-------------------------------------------------------------------------------------------------|
| <i>drl-1</i>   | Full                | Orthologue of mitogen-activated protein kinase kinase kinase 3 isoforms                         |
| <i>rpl-14</i>  | Full                | Protein of the large ribosomal subunit (60S)                                                    |
| <i>let-607</i> | Full                | Orthologue of the CAMP Responsive Element Binding Protein 3 (CREB3) transcription factor family |
| <i>gsk-3</i>   | Strong              | Orthologue of human GSK3B (glycogen synthase kinase 3 beta)                                     |
| <i>ire-1</i>   | Strong              | Inositol-requiring Enzyme 1, a sensor of the UPR                                                |
| <i>ntl-4</i>   | Strong              | Orthologue of human CCR4-NOT Transcription Complex Subunit 4 (CNOT4)                            |
| <i>gtf-2F2</i> | Strong              | Orthologue of human (general transcription factor IIF subunit 2 (GTF2F2)                        |
| <i>elt-2</i>   | Strong              | Orthologue of the transcription factors GATA4/6                                                 |
| <i>skn-1</i>   | Strong              | Orthologue of the transcription factor Nuclear factor erythroid 2-related factor 2 (NRF2)       |

314

315 **Figure 2. Suppressor screen of LBS**

- 316 a) Addition of 0.1 mM Auxin degrades *mdt-15::degron* and leads to expression of  
 317 *Patf-4::gfp* in LSD2096. Pictures were taken 24 h after Auxin addition. Bar = 200  
 318 μm  
 319 b) Summary of the screening outline.  
 320 c) Addition of 0.1 mM Auxin to degrade *mdt-15::degron* after *skn-1* and *let-607*  
 321 RNAi represses activation of *Patf-4::gfp* in LSD2096. Pictures were taken 24 h  
 322 after Auxin addition. Bar = 200 μm

323

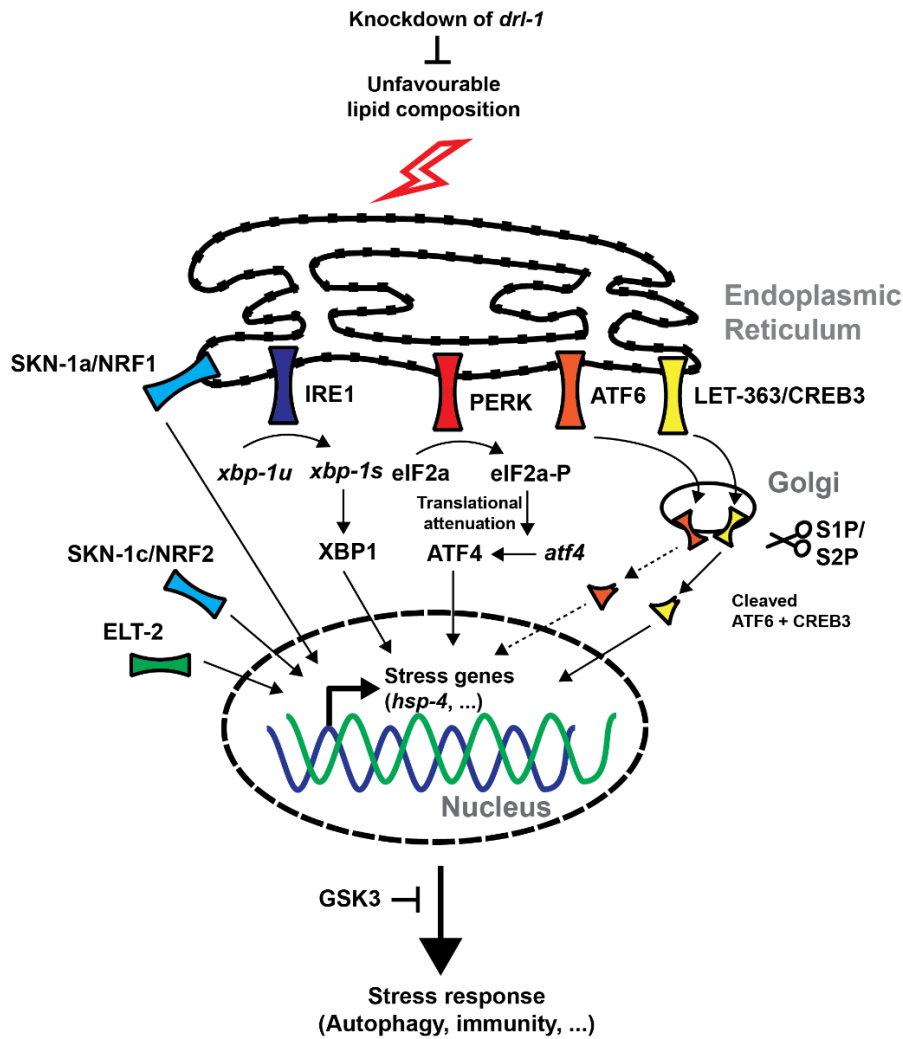

324

325 **Figure 3. Hypothetical model of LBS in *C. elegans***

326 Updated model of LBS in *C. elegans* indicates a complex network of transcription  
327 factors and up- and downstream modulators. 6 out of 9 our hits are included in this  
328 model.

329

330 **Supplemental files are available at FigShare.**

331 Supplementary File1 contains the protocol for 24-well plates AID-RNAi screen.

332 Supplementary Table1 contains the lipotoxicity AID-RNAi screen results.

333

334 **References**

335 Acosta-Montaño, P., & García-González, V. (2018). Effects of dietary fatty  
336 acids in pancreatic beta cell metabolism, implications in homeostasis. *Nutrients*,  
337 *10*(4), 393.

338  
339 Al-Maskari, M., Care, M. A., Robinson, E., Cocco, M., Tooze, R. M., & Doody,  
340 G. M. (2018). Site-1 protease function is essential for the generation of antibody  
341 secreting cells and reprogramming for secretory activity. *Scientific reports*, *8*(1), 1-11.

342  
343 An, J. H., Vranas, K., Lucke, M., Inoue, H., Hisamoto, N., Matsumoto, K., &  
344 Blackwell, T. K. (2005). Regulation of the *Caenorhabditis elegans* oxidative stress  
345 defense protein SKN-1 by glycogen synthase kinase-3. *Proceedings of the National*  
346 *Academy of Sciences*, *102*(45), 16275-16280.

347  
348 Barbosa, S., Fasanella, G., Carreira, S., Llarena, M., Fox, R., Barreca, C., ... &  
349 O'Hare, P. (2013). An Orchestrated Program Regulating Secretory Pathway Genes  
350 and Cargos by the Transmembrane Transcription Factor CREB-H. *Traffic*, *14*(4),  
351 382-398.

352  
353 Beurel, E., Grieco, S. F., & Jope, R. S. (2015). Glycogen synthase kinase-3  
354 (GSK3): regulation, actions, and diseases. *Pharmacology & therapeutics*, *148*, 114-  
355 131.

356  
357 Blackwell, T. K., Steinbaugh, M. J., Hourihan, J. M., Ewald, C. Y., & Isik, M.  
358 (2015). SKN-1/Nrf, stress responses, and aging in *Caenorhabditis elegans*. *Free*  
359 *Radical Biology and Medicine*, *88*, 290-301.

360  
361 Block, D. H., Twumasi-Boateng, K., Kang, H. S., Carlisle, J. A., Hanganu, A.,  
362 Lai, T. Y. J., & Shapira, M. (2015). The developmental intestinal regulator ELT-2  
363 controls p38-dependent immune responses in adult *C. elegans*. *PLoS genetics*,  
364 *11*(5).

365

366 Chamoli, M., Singh, A., Malik, Y., & Mukhopadhyay, A. (2014). A novel kinase  
367 regulates dietary restriction-mediated longevity in *Caenorhabditis elegans*. *Aging*  
368 *Cell*, 13(4), 641-655.

369  
370 Cnop, M., Abdulkarim, B., Bottu, G., Cunha, D. A., Igoillo-Esteve, M., Masini,  
371 M., ... & Bugliani, M. (2014). RNA sequencing identifies dysregulation of the human  
372 pancreatic islet transcriptome by the saturated fatty acid palmitate. *Diabetes*, 63(6),  
373 1978-1993.

374  
375 Covino, R., Hummer, G., & Ernst, R. (2018). Integrated functions of membrane  
376 property sensors and a hidden side of the unfolded protein response. *Molecular cell*,  
377 71(3), 458-467.

378  
379 Cunha, D. A., Cito, M., Carlsson, P. O., Vanderwinden, J. M., Molkentin, J. D.,  
380 Bugliani, M., ... & Cnop, M. (2016). Thrombospondin 1 protects pancreatic  $\beta$ -cells  
381 from lipotoxicity via the PERK–NRF2 pathway. *Cell Death & Differentiation*, 23(12),  
382 1995-2006.

383  
384 Calfon, M., Zeng, H., Urano, F., Till, J. H., Hubbard, S. R., Harding, H. P., ... &  
385 Ron, D. (2002). IRE1 couples endoplasmic reticulum load to secretory capacity by  
386 processing the XBP-1 mRNA. *Nature*, 415(6867), 92-96.

387  
388 Ertunc, M. E., & Hotamisligil, G. S. (2016). Lipid signaling and lipotoxicity in  
389 metaflammation: indications for metabolic disease pathogenesis and treatment.  
390 *Journal of lipid research*, 57(12), 2099-2114.

391  
392 Glover-Cutter, K. M., Lin, S., & Blackwell, T. K. (2013). Integration of the  
393 unfolded protein and oxidative stress responses through SKN-1/Nrf. *PLoS genetics*,  
394 9(9).

395  
396 Goh, G. Y., Martelli, K. L., Parhar, K. S., Kwong, A. W., Wong, M. A., Mah, A.,  
397 ... & Taubert, S. (2014). The conserved Mediator subunit MDT-15 is required for  
398 oxidative stress responses in *Caenorhabditis elegans*. *Aging Cell*, 13(1), 70-79.

399

400 Habacher, C., Guo, Y., Venz, R., Kumari, P., Neagu, A., Gaidatzis, D., ... &  
401 Ciosk, R. (2016). Ribonuclease-mediated control of body fat. *Developmental cell*,  
402 *39*(3), 359-369.

403

404 Harding, H. P., Novoa, I., Zhang, Y., Zeng, H., Wek, R., Schapira, M., & Ron,  
405 D. (2000). Regulated translation initiation controls stress-induced gene expression in  
406 mammalian cells. *Molecular cell*, *6*(5), 1099-1108.

407

408 Ho, N., Wu, H., Xu, J., Koh, J. H., Yap, W. S., Goh, W. W. B., ... & Thibault, G.  
409 (2020). Stress sensor Ire1 deploys a divergent transcriptional program in response to  
410 lipid bilayer stress. *Journal of Cell Biology*, *219* (7): e201909165.

411

412 Hou, N. S., Gutschmidt, A., Choi, D. Y., Pather, K., Shi, X., Watts, J. L., ... &  
413 Taubert, S. (2014). Activation of the endoplasmic reticulum unfolded protein  
414 response by lipid disequilibrium without disturbed proteostasis in vivo. *Proceedings of*  
415 *the National Academy of Sciences*, *111*(22), E2271-E2280.

416

417 Hourihan, J. M., Mazzeo, L. E. M., Fernández-Cárdenas, L. P., & Blackwell, T.  
418 K. (2016). Cysteine sulfenylation directs IRE-1 to activate the SKN-1/Nrf2 antioxidant  
419 response. *Molecular cell*, *63*(4), 553-566.

420

421 Ibrahim, S. H., Akazawa, Y., Cazanave, S. C., Bronk, S. F., Elmi, N. A., Werneburg,  
422 N. W., ... & Gores, G. J. (2011). Glycogen synthase kinase-3 (GSK-3) inhibition  
423 attenuates hepatocyte lipoapoptosis. *Journal of hepatology*, *54*(4), 765-772.

424

425 Koh, J. H., Wang, L., Beaudoin-Chabot, C., & Thibault, G. (2018). Lipid bilayer  
426 stress-activated IRE-1 modulates autophagy during endoplasmic reticulum stress. *J*  
427 *Cell Sci*, *131*(22), jcs217992.

428

429 Khetchoumian, K., Balsalobre, A., Mayran, A., Christian, H., Chénard, V., St-  
430 Pierre, J., & Drouin, J. (2019). Pituitary cell translation and secretory capacities are

431 enhanced cell autonomously by the transcription factor Creb3l2. *Nature*  
432 *communications*, 10(1), 1-13.

433

434 Kitai, Y., Ariyama, H., Kono, N., Oikawa, D., Iwawaki, T., & Arai, H. (2013).  
435 Membrane lipid saturation activates IRE 1 $\alpha$  without inducing clustering. *Genes to*  
436 *Cells*, 18(9), 798-809.

437

438 Lee, D., An, S. W. A., Jung, Y., Yamaoka, Y., Ryu, Y., Goh, G. Y. S., ... & Lee,  
439 S.V (2019). MDT-15/MED15 permits longevity at low temperature via enhancing  
440 lipidostasis and proteostasis. *PLoS biology*, 17(8).

441

442 Lehrbach, N. J., & Ruvkun, G. (2019). Endoplasmic reticulum-associated  
443 SKN-1A/Nrf1 mediates a cytoplasmic unfolded protein response and promotes  
444 longevity. *Elife*, 8, e44425.

445

446 Mann, F. G., Van Nostrand, E. L., Friedland, A. E., Liu, X., & Kim, S. K. (2016).  
447 Deactivation of the GATA transcription factor ELT-2 is a major driver of normal aging  
448 in *C. elegans*. *PLoS genetics*, 12(4).

449

450 Matai, L., Sarkar, G. C., Chamoli, M., Malik, Y., Kumar, S. S., Rautela, U., ... &  
451 Mukhopadhyay, A. (2019). Dietary restriction improves proteostasis and increases  
452 life span through endoplasmic reticulum hormesis. *Proceedings of the National*  
453 *Academy of Sciences*, 116(35), 17383-17392.

454

455 Min, K., Kang, J., & Lee, J. (2010). A modified feeding RNAi method for simultaneous  
456 knock-down of more than one gene in *Caenorhabditis elegans*. *Biotechniques*, 48(3),  
457 229-232.

458

459 Park, J. S., Kang, D. H., & Bae, S. H. (2015). Concerted action of p62 and  
460 Nrf2 protects cells from palmitic acid-induced lipotoxicity. *Biochemical and*  
461 *biophysical research communications*, 466(1), 131-137.

462

463 Parr, C., Carzaniga, R., Gentleman, S. M., Van Leuven, F., Walter, J., &  
464 Sastre, M. (2012). Glycogen synthase kinase 3 inhibition promotes lysosomal  
465 biogenesis and autophagic degradation of the amyloid- $\beta$  precursor protein. *Molecular*  
466 *and cellular biology*, 32(21), 4410-4418.

467  
468 Preston, A. M., Gurisik, E., Bartley, C., Laybutt, D. R., & Biden, T. J. (2009).  
469 Reduced endoplasmic reticulum (ER)-to-Golgi protein trafficking contributes to ER  
470 stress in lipotoxic mouse beta cells by promoting protein overload. *Diabetologia*,  
471 52(11), 2369-2373.

472  
473 Reiling, J. H., Olive, A. J., Sanyal, S., Carette, J. E., Brummelkamp, T. R.,  
474 Ploegh, H. L., ... & Sabatini, D. M. (2013). A CREB3-ARF4 signalling pathway  
475 mediates the response to Golgi stress and susceptibility to pathogens. *Nature cell*  
476 *biology*, 15(12), 1473-1485.

477  
478 Saito, A., Hino, S. I., Murakami, T., Kanemoto, S., Kondo, S., Saitoh, M., ... &  
479 Ikawa, M. (2009). Regulation of endoplasmic reticulum stress response by a  
480 BBF2H7-mediated Sec23a pathway is essential for chondrogenesis. *Nature cell*  
481 *biology*, 11(10), 1197-1204.

482  
483 Sampieri, L., Di Giusto, P., & Alvarez, C. (2019). CREB3 transcription factors:  
484 ER-Golgi stress transducers as hubs for cellular homeostasis. *Frontiers in Cell and*  
485 *Developmental Biology*, 7, 123.

486  
487 Schwarz, D. S., & Blower, M. D. (2016). The endoplasmic reticulum: structure,  
488 function and response to cellular signaling. *Cellular and Molecular Life Sciences*,  
489 73(1), 79-94.

490  
491 Shomer, N., Kadhim, A. Z., Grants, J. M., Cheng, X., Alhusari, D., Bhanshali, F., ... &  
492 Shih, J. (2019). Mediator subunit MDT-15/MED15 and Nuclear Receptor HIZR-  
493 1/HNF4 cooperate to regulate toxic metal stress responses in *Caenorhabditis*  
494 *elegans*. *PLoS Genetics*, 15(12).

495

496 Silva, M. C., Fox, S., Beam, M., Thakkar, H., Amaral, M. D., & Morimoto, R. I.  
497 (2011). A genetic screening strategy identifies novel regulators of the proteostasis  
498 network. *PLoS genetics*, 7(12).

499  
500 Singh, J., & Aballay, A. (2017). Endoplasmic reticulum stress caused by  
501 lipoprotein accumulation suppresses immunity against bacterial pathogens and  
502 contributes to immunosenescence. *MBio*, 8(3), e00778-17.

503  
504 Taubert, S., Hansen, M., Van Gilst, M. R., Cooper, S. B., & Yamamoto, K. R.  
505 (2008). The Mediator subunit MDT-15 confers metabolic adaptation to ingested  
506 material. *PLoS genetics*, 4(2).

507  
508 Teuscher, A. C. & Ewald, C. Y. Overcoming Autofluorescence to Assess GFP  
509 Expression During Normal Physiology and Aging in *Caenorhabditis elegans*. *BIO-*  
510 *PROTOCOL* 8, (2018).

511  
512 Thibault, G., Shui, G., Kim, W., McAlister, G. C., Ismail, N., Gygi, S. P., ... &  
513 Ng, D. T. (2012). The membrane stress response buffers lethal effects of lipid  
514 disequilibrium by reprogramming the protein homeostasis network. *Molecular cell*,  
515 48(1), 16-27.

516  
517 Tomoishi, S., Fukushima, S., Shinohara, K., Katada, T., & Saito, K. (2017).  
518 CREB3L2-mediated expression of Sec23A/Sec24D is involved in hepatic stellate cell  
519 activation through ER-Golgi transport. *Scientific reports*, 7(1), 1-11.

520  
521 Volmer, R., van der Ploeg, K., & Ron, D. (2013). Membrane lipid saturation  
522 activates endoplasmic reticulum unfolded protein response transducers through their  
523 transmembrane domains. *Proceedings of the National Academy of Sciences*,  
524 110(12), 4628-4633.

525  
526 Wang, W., & Chan, J. Y. (2006). Nrf1 is targeted to the endoplasmic reticulum  
527 membrane by an N-terminal transmembrane domain Inhibition of nuclear



528 translocation and transacting function. *Journal of Biological Chemistry*, 281(28),  
529 19676-19687.

530

531 Weicksel, S. E., Mahadav, A., Moyle, M., Cipriani, P. G., Kudron, M., Pincus,  
532 Z., ... & Fernandez, A. G. (2016). A novel small molecule that disrupts a key event  
533 during the oocyte-to-embryo transition in *C. elegans*. *Development*, 143(19), 3540-  
534 3548.

535

536 Zhang, L., Ward, J. D., Cheng, Z., & Dernburg, A. F. (2015). The auxin-  
537 inducible degradation (AID) system enables versatile conditional protein depletion in  
538 *C. elegans*. *Development*, 142(24), 4374-4384.

539

540

541
